# Supplementary material for: Individual Differences in Responsiveness to Acupuncture: An Exploratory Survey of Practitioner Opinion
Source: Medicines (Basel). 2018 Aug 6;5(3):85. doi: 10.3390/medicines5030085 (PMC6163768; doi:10.3390/medicines5030085)
Supplement: Supplementary file 1 [file medicines-05-00085-s001.zip › Supplementary material for 7-zip/Individual responsiveness to acupuncture - original data.xlsx]

## Sheet: Original survey data
web N	N	1. I have read and understood the text above, confirm that the data I provide can be used for the stated purposes of this project, and that I consent to take part in the survey voluntarily.	2. Your age (in years)	3. Your gender	4. What do you consider as your main profession?	4.a. If you selected 'Other', please specify.	5. With which organisation did you do most of your acupuncture training?	6. Which of these UK professional acupuncture or Chinese Medicine associations do you belong to? (You may indicate more than one.)	6.a. If you selected 'Other (or None)', please specify.	7. What style/s of acupuncture do you use most? (You may indicate more than one.)	7.a. If you selected 'Other', please specify.	8. How many years have you used acupuncture in your practice?	9. Before you knew about this survey, did you ever consider that patient characteristics (such as their temperament or personality traits) might affect their response to treatment?	9.a. If you answered 'Yes', please give details:	Particular patient characteristics for you to consider	10. Particular patient characteristics, attitudes or experience that you think may contribute to how well (or poorly) they respond to acupuncture. (Information on those that are asterisked can be found under 'More Info', above.)	10.1.a. Gender - What you THINK NOW affects response	10.1.b. Gender - What you THOUGHT THEN (in clinic) affected response	10.1.c. Gender - Space for your comments	10.2.a. Age - What you THINK NOW affects response	10.2.b. Age - What you THOUGHT THEN (in clinic) affected response	10.2.c. Age - Space for your comments	10.3.a. Ethnicity - What you THINK NOW affects response	10.3.b. Ethnicity - What you THOUGHT THEN (in clinic) affected response	10.3.c. Ethnicity - Space for your comments	10.4.a. Birth and prenatal experience - What you THINK NOW affects response	10.4.b. Birth and prenatal experience - What you THOUGHT THEN (in clinic) affected response	10.4.c. Birth and prenatal experience - Space for your comments	10.5.a. Character as a baby, child or adolescent - What you THINK NOW affects response	10.5.b. Character as a baby, child or adolescent - What you THOUGHT THEN (in clinic) affected response	10.5.c. Character as a baby, child or adolescent - Space for your comments	10.6.a. Childhood health - What you THINK NOW affects response	10.6.b. Childhood health - What you THOUGHT THEN (in clinic) affected response	10.6.c. Childhood health - Space for your comments	10.7.a. Family’s health in patient’s childhood - What you THINK NOW affects response	10.7.b. Family’s health in patient’s childhood - What you THOUGHT THEN (in clinic) affected response	10.7.c. Family’s health in patient’s childhood - Space for your comments	10.8.a. Childhood poverty - What you THINK NOW affects response	10.8.b. Childhood poverty - What you THOUGHT THEN (in clinic) affected response	10.8.c. Childhood poverty - Space for your comments	10.9.a. Childhood abuse, neglect, trauma or bereavement - What you THINK NOW affects response	10.9.b. Childhood abuse, neglect, trauma or bereavement - What you THOUGHT THEN (in clinic) affected response	10.9.c. Childhood abuse, neglect, trauma or bereavement - Space for your comments	10.10.a. Later abuse or trauma - What you THINK NOW affects response	10.10.b. Later abuse or trauma - What you THOUGHT THEN (in clinic) affected response	10.10.c. Later abuse or trauma - Space for your comments	10.11.a. Level of education - What you THINK NOW affects response	10.11.b. Level of education - What you THOUGHT THEN (in clinic) affected response	10.11.c. Level of education - Space for your comments
	2	Yes	52	Male	Other	Neurofeedback	na	Other (or None)	none	Other	na	0	Yes	High "N" are always a problem			Yes	Yes		Yes	Yes		No	No		Don't know			Yes	Yes	High "N"	Don't know			Don't know			No	No	No BUT will affect the presentation of symptoms	Yes	Yes		Don't know			Yes	Yes	smart guys find it more difficult
	1	Yes	50	Female	Acupuncturist or traditional Chinese medicine (TCM) practitioner		London College of Traditional Acupuncture	British Acupuncture Council (BAcC)		Traditional Chinese Medicine, TCM		7	Yes	I anticipated that patients with more open and accepting attitudes to non western medicine may respond better, but have been puzzled when this is not always the case.			Yes	Yes	I see more women than men and feel women will tend to commit to a few treatments until they see results. Men tend to have to see a result with one or maybe two treatments in order to continue. Men often find it harder to relax.	Yes	Yes	Youngsters tend to respond very quickly.	Don't know	No		Yes	Yes		Don't know	No	I rarely ask about this	Don't know	No		Don't know	No		Don't know	No		Don't know	No	One very good responder comes into this category, but the subject in general may not come up.	Don't know	No		Don't know	No	I mainly treat more wealthy, better educated people by virtue of being in the private sector, but the minority who appear to be less well educated have all responded well.
	3	Yes	64	Male	Acupuncturist or traditional Chinese medicine (TCM) practitioner		college of traditional acupuncture, UK	British Acupuncture Council (BAcC)		Traditional Chinese Medicine, TCM,Five Element, 5E		34	Yes	it seems evident that patients vary in their responsiveness, that various factors are probably involved in this (usually the case in complex biological systems), and hence that patient characteristics are likely to be among those factors			No			Yes			No			Don't know			Don't know			Don't know			Don't know			Don't know			Don't know			Don't know			No
	4	Yes	53	Female	Other	University Lecturer	CICM	British Acupuncture Council (BAcC)		Traditional Chinese Medicine, TCM,Five Element, 5E		10	Yes	Yes, I have an interest in placebo effects and responders/non-responders and how conditioning and verbal cues can influence outcomes and this may be related to genetic polymorphisms in specific genes that can influence whether someone is a responder/non-responder to a particular placebo intervention.			No	No	I don't think gender makes a difference - it is due to patients who elect to have acupuncture treatment. In this respect I have more female patients (approx 60:40 ratio female:male) and the conditions they come for treatment varies.	No	No		Yes	No		Don't know			Yes			Yes			Don't know			Don't know			Yes			Yes			No	No
1	5	Yes	28	Male	Acupuncturist or traditional Chinese medicine (TCM) practitioner		The Academy of Oriental Medicine	Other (or None)	BRCP - British Register of Complementary Practicioners	Traditional Chinese Medicine, TCM,Other	Si Yuan / Dr Tan Balance Method Acupuncture	2	Yes	Greater results have been observed for patients with expectation of a positive outcome and who enjoy the session			No	No		No	No		No	No		No	No	Except potentially for pre-natal Jing deficiency, acupuncture might not be the best method as could be draining, it would also take a lot of sessions to see significant results.	No	No		No	No	Can impact the constitution and health but should not impact the response to the treatment.	No	No	Can impact the constitution and health but should not impact the response to the treatment.	No	No	Can impact the constitution and health but should not impact the response to the treatment.	No	No	Can impact the constitution and health but should not impact the response to the treatment.	No	No	Can impact the constitution and health but should not impact the response to the treatment.	No	No	The acupuncturist should be able to explain the treatment to all levels of education. Negative perception of the treatment or confusion could lead to poor results.
2	6	Yes	52	Female	Acupuncturist or traditional Chinese medicine (TCM) practitioner		Acupuncture Academy	British Acupuncture Council (BAcC)		Traditional Chinese Medicine, TCM,Five Element, 5E		2	Yes	Having read the john Hamwee book last year, I'd thought it may be connected to the patient CF (make up) but not explored more than that.			No	No		No	No		No	No		No	No		Don't know	Yes		No	Yes		No	Yes		Yes	Yes		Yes	Yes		Yes	Yes		No	No
3	7	Yes	36	Male	Physiotherapist		AACP	Acupuncture Association of Chartered Physiotherapists (AACP)		Traditional Chinese Medicine, TCM,Western medical acupuncture		10	Yes				No			No			Yes			No			No			No			No			No			No			No			No
4	8	Yes	57	Male	Medical doctor		BMAS	British Medical Acupuncture Society (BMAS)		Trigger point method		17	No				No			No			Don't know			Don't know			Don't know			Don't know			Don't know			Don't know			Don't know			Don't know			Don't know
5	9	Yes	59	Male	Acupuncturist or traditional Chinese medicine (TCM) practitioner		CICM	Association of Traditional Chinese Medicine (ATCM)		Traditional Chinese Medicine, TCM,Five Element, 5E,Other	FSN	18	Yes	Too broad to give a specific answer here.			No	No		Yes	Yes		Don't know			Don't know			Don't know			Yes	Yes		Yes	Yes		Yes	Yes		Yes	Yes		Yes	Yes		Yes	Yes	Highly educated people are skeptical of traditional medicines and seem to be less appreciate of caring and kindness
6	10	Yes	72	Male	Medical doctor		None	British Medical Acupuncture Society (BMAS)		Western medical acupuncture		38	Yes	I had considered this carefully. but come to no obvious conclusion.			Yes	No		Yes	Yes		Yes	Yes		No	No		No	No		No	No		No	No		No	No		No	No		No	No		Yes	Yes
7	11	Yes	84	Male	Medical doctor		Dr Felix Mann	British Medical Acupuncture Society (BMAS)		Western medical acupuncture		40	Yes	Must be willing to have acupuncture. Belief is irrelevant.			No	No		No	No		No	No		Don't know			Don't know			Don't know			Don't know			Don't know			Don't know			Don't know			No	No
8	12	Yes	63	Female	Other	Physical therapist/Acupuncturist	Wrexham University	Association of Traditional Chinese Medicine (ATCM),Other (or None)	Federation of Holistic Therapists (FHT)	Traditional Chinese Medicine, TCM,Trigger point method,Western medical acupuncture		3	Yes	I have been a practising physical therapist for twenty years - experience tells me that patient's have all sorts of reasons for getting better - and - not getting better.			No	No		No	No		No	No		Don't know			Don't know			Don't know			Don't know			Don't know			Don't know			Don't know			No	No
9	13	Yes	39	Female	Acupuncturist or traditional Chinese medicine (TCM) practitioner		London college of traditional acupuncture	British Medical Acupuncture Society (BMAS)		Traditional Chinese Medicine, TCM,Trigger point method		10	Yes	I have some patients who seem stuck and unwilling to make changes to get better. It doesn't surprise me that any benefits are short lived			No	No		Yes	Yes	Younger patients tend to have less complex conditions to treat so tend to respond more quickly to treatment	No	No		No	No		No	No		Yes	Yes	If people have had chronic health problems for a long time their response to treatment is generally not as good	Yes	No	From working in a paediatric acupuncture clinic I can see how the families' health can impact on a childs	Yes	No		Yes	Yes	A high proportion of patients I see have had a form of abuse as a child and since I see these in high numbers I felt it was linked to their poor health later on	Yes	Yes	As above	No	No
10	14	Yes	64	Female	Acupuncturist or traditional Chinese medicine (TCM) practitioner		British College of Acupuncture London	Association of Traditional Chinese Medicine (ATCM)		Traditional Chinese Medicine, TCM		28	Yes	not usually either of the above but in areas of mental health			No	No		No	No		No	No		Don't know			Don't know			Don't know			Don't know			Don't know			Yes	Yes		Yes	Yes		No	No
11	15	Yes	63	Female	Acupuncturist or traditional Chinese medicine (TCM) practitioner		BAWMA	British Academy of Western Medical Acupuncture (BAWMA)		Western medical acupuncture		8	No				No			No			No			No			Don't know			Don't know			Don't know			Don't know			Yes			Yes			No
12	16	Yes	62	Female	Acupuncturist or traditional Chinese medicine (TCM) practitioner		BAWMA	British Academy of Western Medical Acupuncture (BAWMA)		Western medical acupuncture		1	Yes	I have found sceptical people to be quite surprised about the effects AP has had on them.			No	Yes		No	No		No	Yes		Don't know	No		Don't know	No		Don't know	No		Don't know	No		Don't know	No		Yes	Yes		Yes	Yes		No	Yes
13	17	Yes	56	Female	Acupuncturist or traditional Chinese medicine (TCM) practitioner		BAWMA	British Academy of Western Medical Acupuncture (BAWMA)		Western medical acupuncture		10	No				No	No		No	No		No	No		Yes	Yes		Yes	Yes		Yes	Yes		Yes	Yes		Don't know			Don't know			Don't know	Yes		Yes	Yes
14	18	Yes	66	Female	Acupuncturist or traditional Chinese medicine (TCM) practitioner		College of Traditional Acupuncture, Leamington	British Acupuncture Council (BAcC)		Traditional Chinese Medicine, TCM,Five Element, 5E		24	Yes	determination to go through the agreed course of treatment and willingness to follow helpful advice makes a big difference.			No			Yes	Yes	Someone who is very elderly and in a very poor state of health may not respond so well.	No			Yes	No	Situations such as where the parents are old and the patients Jing is compromised may not respond as well.	No			Yes	No	Patients in poor health as a child and coming to clinic in poor health can need much more long term treatment	Don't know	Yes		No	Yes		No	No	Tra	Yes	No	Some situations partners control over the patient can affect outcome.	No	Yes
15	19	Yes	45	Female	Other	Dental Hygienist	BAWMA	British Academy of Western Medical Acupuncture (BAWMA)		Western medical acupuncture		1	Yes	Some patients are really interested and have tried other holistic treatments, others are sceptical and want miracles to happen to be convinced it works.			No			No			No			No			No			No			No			No			No			No			No
16	20	Yes	56	Male	Other	Nurse	BAWMA & Yuan Clinic	British Academy of Western Medical Acupuncture (BAWMA),Other (or None)	I have continued to do training with Yuan clinic	Traditional Chinese Medicine, TCM,Western medical acupuncture		12	No				Yes	Yes		No			Yes			No			Don't know			Don't know			No			Don't know			No			Don't know			Yes
17	21	Yes	53	Female	Other	Sister in Pain Management	BAWMA	British Academy of Western Medical Acupuncture (BAWMA)		Western medical acupuncture		14	Yes	People who affirm to acupuncture appear to get more benefit. However, non believers can also get the same benefit as well!			No	No	I have always believed male and female have the same chance of successful acupuncture	No	No		No	No		No	No		No	No		Yes	Yes	Depending on values, illnesses foe example childhood injury can still bear affect of acupuncture	Yes	Yes,No	As above	Yes	Yes		Yes	No	At times this can be a challenge and can take longer to attain acupuncture benefit	Yes	Yes		No	No
18	22	Yes	46	Male	Acupuncturist or traditional Chinese medicine (TCM) practitioner		Two teachers, post qualification	British Acupuncture Council (BAcC)		Other	Neijing channel	17	Yes	This thought is unstable. Often it is my lack of understanding, often I have misread their condition			No	No		No	No		No	No		No	No		Yes	Yes		No	No		No	No		No	No		Yes	Yes	There’s a difference between a predictor for bad response and a reason for a bad response	Yes	Yes		No	No
19	23	Yes	72	Male	Acupuncturist or traditional Chinese medicine (TCM) practitioner		CTA	British Acupuncture Council (BAcC)		Traditional Chinese Medicine, TCM,Five Element, 5E		25	Yes	Some patients are mode open to change than others			No	No		No	No		No	No		Yes	Yes		Don't know	No		Yes	Yes		Don't know	No		Yes	Yes		Yes	Yes		Yes	Yes		Don't know	No
20	24	Yes	46	Male	Acupuncturist or traditional Chinese medicine (TCM) practitioner		CICM	British Acupuncture Council (BAcC)		Traditional Chinese Medicine, TCM,Five Element, 5E,Japanese acupuncture,Korean acupuncture		3	Yes	5 Element training & theory highlight which CF factor patients will react better to treatment than others			No	No		No	No		No	No		Don't know	No		Yes	Yes		No	No		No	No		Yes	Yes		Yes	Yes		Yes	Yes		Yes	Yes
21	25	Yes	38	Female	Acupuncturist or traditional Chinese medicine (TCM) practitioner		Salford university	British Acupuncture Council (BAcC)		Traditional Chinese Medicine, TCM		16	Yes	Some people are very 'closed off' and so not easy to reach their qi.			No	No		No	Yes		Don't know	No		Yes	Yes		Don't know			Yes	Yes		Yes	Yes		No	No		No	Yes		No	Yes		No	No
22	26	Yes	56	Female	Acupuncturist or traditional Chinese medicine (TCM) practitioner		Westminster University	British Acupuncture Council (BAcC)		Traditional Chinese Medicine, TCM		17	No				Don't know			Don't know			Don't know			Don't know			Don't know			Don't know			Don't know			Don't know			Don't know			Don't know			Don't know
23	27	Yes	70	Female	Acupuncturist or traditional Chinese medicine (TCM) practitioner		College of Traditional Acupuncture - Leamington	British Acupuncture Council (BAcC)		Traditional Chinese Medicine, TCM,Five Element, 5E		22	Yes	anyone qualified would know this as part of their studies if not common sense			Yes	Yes		No	Yes		No	No		Yes	Yes		Yes	Yes		Yes	Yes		Yes	Yes		Yes	Yes		Yes	Yes		Yes	Yes		No	No
24	28	Yes	52	Female	Acupuncturist or traditional Chinese medicine (TCM) practitioner		LCTA	British Acupuncture Council (BAcC)		Traditional Chinese Medicine, TCM		9	Yes	This had occurred to me as a reason why some patients don't appear to benefit.			No	No		No	No		No	No		Don't know			Don't know			Yes	Yes		Yes	Yes		Don't know			Don't know			Yes	Yes		No	No
25	29	Yes	47	Female	Acupuncturist or traditional Chinese medicine (TCM) practitioner		At college	British Acupuncture Council (BAcC)		Traditional Chinese Medicine, TCM		12	Yes	Some of us are more open to change so more metal types can be more resistant. Having said that I find patients whom are reluctant to share health information and I suspect are more metal to be the ones I lose and have less good results with.			Yes	Yes	Men more often look for direct results relating to presenting condition. Women see other holistic benefits.	Yes	Yes	Older people, over 70's, seem less open to change and if on much medication may slow down response time to treatment.	No	No		Yes	Yes		Don't know	No		Yes	Yes		Yes	Yes		Yes	Yes		Yes	Yes		Yes	Yes		No	No
26	30	Yes	37	Male	Acupuncturist or traditional Chinese medicine (TCM) practitioner		Lsbu	British Acupuncture Council (BAcC)		Traditional Chinese Medicine, TCM,Trigger point method,Other	DNA (Bob Doane)	1	Yes	Some people are clearly stuck in the "sick role" mindset and therefore physically get better but don't believe they are. Others also forget the majority of symptoms they have on first consultation and need reminding that they had those symptoms (because they have been resolved) Patients with an Optimistic outlook on life seem to generally report better responses			Don't know	No		No	No		Don't know			Don't know			Don't know			Don't know			Don't know			Don't know			Yes	Yes		Yes	Yes		No	Yes	I believe education level can affect the ability to understand ourselves
27	31	Yes	40	Female	Acupuncturist or traditional Chinese medicine (TCM) practitioner		CTA	British Acupuncture Council (BAcC)		Traditional Chinese Medicine, TCM,Five Element, 5E		8	No				No	No		No	No		No	No		No	No		No	No		Yes	Yes		No	No		No	No		Yes	Yes		Yes	Yes		No	No
28	32	Yes	47	Female	Acupuncturist or traditional Chinese medicine (TCM) practitioner		LCTA	British Acupuncture Council (BAcC),Other (or None)	CNHC	Traditional Chinese Medicine, TCM		7	No				No	No		Yes	Yes		No	No		Yes	No		Yes	Yes		Yes	Yes		Yes	Yes		Don't know	No		Yes	Yes		Yes	Yes		No	No
29	33	Yes	46	Female	Acupuncturist or traditional Chinese medicine (TCM) practitioner		The Australian College of Natural Medicine in Brisbane, Australia	British Acupuncture Council (BAcC)		Traditional Chinese Medicine, TCM		11	Yes				Yes	Yes		No	No		No	No		Yes	Yes		Yes	Yes		Yes	Yes		Yes	Yes		Don't know	No		Yes	Yes		Yes	Yes		No	No
30	34	Yes	58	Female	Acupuncturist or traditional Chinese medicine (TCM) practitioner		Salford University	British Acupuncture Council (BAcC)		Traditional Chinese Medicine, TCM,Other	Dr Tan Balanced acupuncture	8	Yes	The mind is extraordinarily powerful and patients who are willing to engage tend to do better			No	No		No	No		Don't know	No		Yes	Yes		Yes	Yes		Yes	Yes		Yes	Yes		Yes	Yes		Yes	Yes		Yes	Yes		Don't know	Yes
31	35	Yes	63	Female	Acupuncturist or traditional Chinese medicine (TCM) practitioner		ICOM	British Acupuncture Council (BAcC)		Traditional Chinese Medicine, TCM,Five Element, 5E,Trigger point method,Other	Stems and Branches	33	No				No	No		No	No		No	No		No	No		No	No		No	No		No	No		No	No		No	No		No	No		No	No
32	36	Yes	65	Female	Acupuncturist or traditional Chinese medicine (TCM) practitioner		Beijing University of Chinese Medicine China	Association of Traditional Chinese Medicine (ATCM),British Acupuncture Council (BAcC)		Traditional Chinese Medicine, TCM		26	Yes	Because TCM believes the body as a whole, so his/her mental state should influence throughout body. Acup needs to a right correspondence from the patient, so I treat his/her physical problem, I will consider his/her mental state. If abnormal of it, I can treat together.			Yes	Yes		Yes	Yes		Yes	Yes		Yes	Yes		Yes	Yes		Yes	Yes		Yes	Yes		Yes	Yes		Yes	Yes		Yes	Yes		Yes	Yes
33	37	Yes	67	Male	Medical doctor		Bawma	British Academy of Western Medical Acupuncture (BAWMA)		Western medical acupuncture		20	Yes	Patients anxious about the therapist or the possibility of pain do worse			No			No			Yes		Caucasians seem keener	Yes		Many had in labour	Don't know			Don't know			Don't know			Don't know			Yes			Yes			Yes
34	38	Yes	57	Male	Acupuncturist or traditional Chinese medicine (TCM) practitioner		northern college of acupuncture	British Acupuncture Council (BAcC)		Traditional Chinese Medicine, TCM,Trigger point method,Other	a la David Legge	10	Yes				No	No		Yes	Yes		No	No		Don't know			Don't know			No			Don't know			Don't know			Don't know			Don't know			No
35	39	Yes	54	Female	Acupuncturist or traditional Chinese medicine (TCM) practitioner		CICM	British Acupuncture Council (BAcC)		Traditional Chinese Medicine, TCM,Five Element, 5E,Trigger point method,Western medical acupuncture		10	Yes	I sometimes think the patient is not quite engaged into getting well. There are negative observations and the condition is part of them, or is them. These types of patients take time as I believe the condition has gone beyond organ level and at cellular level. The patient doesn’t have the capacity to commit to treatment.			Yes	Yes		Yes	Yes	I find the older generation harder to commit to treatment especially if their doctor is also involved. They tend to want to stop and see what happens with the Western approach.	Yes	No	Generally Asian over 70 females being cared for by family. Looking for sympathy and attention. If they get better they loose some connection with their carer	No	No		No	No		Yes	No		No	No		No	Yes		Yes	Yes		Yes	Yes		No	No
36	40	Yes	62	Male	Acupuncturist or traditional Chinese medicine (TCM) practitioner		CICM	British Acupuncture Council (BAcC)		Traditional Chinese Medicine, TCM,Five Element, 5E		32	Yes	The more bubbly the likely of strong response. Positivity helps the placebo response			No	No		Yes	Yes		No	No		Yes	Yes		Yes	Yes		Yes	Yes		Yes	Yes		Don't know			Yes	Yes		Yes	Yes		Don't know
37	41	Yes	57	Female	Acupuncturist or traditional Chinese medicine (TCM) practitioner		College for Naturopathic Medicine (CNM)	British Acupuncture Council (BAcC)		Traditional Chinese Medicine, TCM		10	No				No	No		Yes	Yes		No	No		No	No		No	No		Yes	Yes		Yes	Yes		No	No		Don't know	Yes		Don't know	Yes		Yes	No
38	42	Yes	45	Female	Acupuncturist or traditional Chinese medicine (TCM) practitioner		The Acupuncture Academy	British Acupuncture Council (BAcC)		Traditional Chinese Medicine, TCM,Five Element, 5E		2	Yes	Some people seem very 'closed' to the idea of acupuncture, as such it is difficult to connect with them as they are defensive, sceptic or want to be argumentative.			No	No		Yes	No		No	No		Don't know	No		Yes	No		Yes	Yes		Yes	Yes		Yes	Yes		Yes	Yes		Yes	Yes		No	No
39	43	Yes	56	Female	Physiotherapist		CICM	Acupuncture Association of Chartered Physiotherapists (AACP),British Acupuncture Council (BAcC)		Traditional Chinese Medicine, TCM,Five Element, 5E,Trigger point method,Western medical acupuncture		22	Yes	experience as a Physiotherapist showed that this is often the case			No	No	statistics show that women are more likely to seek treatment anyway, so that will possibly show some bias in response.	Yes	No	multiple comorbidities and multiple medications are probably a factor in response to treatment in elderly.	Don't know		because if my work in the NHS I have treated a variety of nationalities and have not noticed a strong ethnic bias in response.	Don't know			Don't know			Don't know			Don't know		not sure I would factor that in to my treatment but often it is the effect this can have on their mental health can be more significant tha on their physical health.	Don't know			Yes	Yes	working in a Chronic Pain Unit has proven that these factors are significant in how people respond to any treatment, not just acupuncture. there is a huge body of research that backs this up. when I 1st started working in my present job I didn't want to believe it, but long term experience has borne this out.	Yes		all types of abuse and trauma, including PTSD have a huge effect on the patients ability to cope with pain/illness, as shown by my work in a Chronic Pain unit..	No	Yes	again research shows that patients of low educational level are more likely to suffer chronic pain and other illnesses. some respond well but some are unable to understand the deeper influences on their physical + mental health and continue to seek an answer in medications or other treatment like that, even when all treatments they have had up to now have failed..
40	44	Yes	55	Female	Other	Advanced Nurse Practitioner/Acupuncturist	BAWMA	British Academy of Western Medical Acupuncture (BAWMA)		Western medical acupuncture		30	Yes	Most patients who are paying for treatment are open to its effectiveness. Saying that I have had good results even with the most sceptical of patients.			Yes	Yes		Yes	Yes		Don't know			Don't know			Don't know			Don't know			Yes	Yes		Don't know			Yes	Yes		Yes	Yes		Yes	Yes
41	45	Yes	69	Male	Acupuncturist or traditional Chinese medicine (TCM) practitioner		Brit Coll of Acup, School of Chin Herb Med, Int Train Centre TCM Guangzhou, Int Train Centre Nanjing	British Acupuncture Council (BAcC)		Traditional Chinese Medicine, TCM		35	Yes	patient characteristics will affect the treatment response without doubt. I find it difficult to answer these questions for a number of reasons: 1) 'characteristics such as temperament or personality traits' seem a little fuzzy to me, especially in the context of whether they have an exterior invasion or a deep deficiency and their subsequent treatment response 2) emotions like anger undoubtedly …			Don't know	No	to answer this with yes and no seems illconceived to me. I do find women respond better, but only if they are more openminded and less 'locked in' emotionally, which not all women are	Yes	Yes	age is a factor to treatment response primarily if it involves prolonged imbalances and deficiencies, but not per se. If this whole exercise is angled around biochemical markers or what you define as central sensitisation, then you have lost me	Don't know	No		Yes	Yes	many difficult-to-resolve blockages are probably affected by birth and prenatal experiences	Yes	Yes	see above	Yes	Yes	see above	Yes	Yes	another fuzzy question. If you mean genetic weaknesses, then certainly. If you mean family dynamics, then that affects the treatment outcome also, but for very different reasons	Yes	Yes	pretty obvious as disease factors, but do they affect the response to acupuncture. I repeat: a patient with a healthy, balanced qi will respond better to acupuncture treatment and vice versa .	Yes	Yes	pretty obvious, plus see above	Yes	Yes	pretty obvious, plus see above	Don't know	No	Stephen Hawkins is well educated, does that mean he responds to acupuncture better?
42	46	Yes	29	Female	Physiotherapist		AACP	Acupuncture Association of Chartered Physiotherapists (AACP)		Western medical acupuncture		1	Yes	If we want to treat a patient from a biophycosocial approach, you can't thing that is not affecting the repons in a certain percentage			No			Yes			No			Yes			Yes			Yes			Yes			Yes			Yes			Yes			Yes
43	47	Yes	63	Female	Medical doctor		A general practice	British Medical Acupuncture Society (BMAS)		Trigger point method		32	Yes	only in tolerance of needles			No	No		No	No		Yes	Yes		Don't know			Don't know			Don't know			Yes	Yes		No	No		No	No		No	No		No	No
44	48	Yes	52	Female	Physiotherapist		AACP	Acupuncture Association of Chartered Physiotherapists (AACP)		Traditional Chinese Medicine, TCM,Trigger point method,Western medical acupuncture		10	Yes	possibly respond better if have had previous good experience of ACP or experience of friend/family member who has, or particularly interested to try ACP. Possibly poor responders if highly strung and looking for 'quick fix'.			Don't know	No		Don't know	No		Don't know	No		Don't know	No		Yes	Yes	may enhance response or make hypersensitive	Yes	Yes		Yes	Yes		Don't know	No		Don't know	No		Yes	Yes	more sensitive	Yes	Yes	enhances likely good response
45	49	Yes	39	Female	Acupuncturist or traditional Chinese medicine (TCM) practitioner		London College of Traditional Acupuncture (LCTA) - Now Closed.	British Acupuncture Council (BAcC)		Traditional Chinese Medicine, TCM,Five Element, 5E		20	Yes	If a patient has trust issues, for example, then there is always an element of you having to prove yourself continually. To gain trust over and over by being honest, effective and consistent is to help with their symptoms and pathology.			Yes	No		No	No		Yes	No	I now have a greater understanding of how the concept of privilege impacts on BMAE population.	Yes	Yes		Yes	Yes		Yes	Yes		Yes	Yes		Yes	Yes		Yes	Yes		Yes	Yes		No	Yes
46	50	Yes	57	Female	Acupuncturist or traditional Chinese medicine (TCM) practitioner		LSATCM	British Acupuncture Council (BAcC)		Traditional Chinese Medicine, TCM		24	Yes				Yes	Yes		Yes	Yes		Don't know	No		Don't know	No		Yes	Yes		Yes	Yes		Yes	Yes		Don't know	Yes		Yes	Yes		Yes	Yes		Don't know	Yes
47	51	Yes	55	Female	Acupuncturist or traditional Chinese medicine (TCM) practitioner		The Acupuncture Academy	British Acupuncture Council (BAcC)		Five Element, 5E		3	Yes	I have frequently wondered what determines how well a patient responds to acupuncture. From my clinic exerpience it is not simply how open the patient is to acupuncture, but a complex mix of the patient’s physiology/mind/spirit, the quality of the relationship between me and the patient, and the treatment			Yes	No	It’s not that gender affects the treatment, more that I see less men in clinic so it biases the sample in terms of how well men versus women respond to acupuncture	No	No		No	No		Don't know			Don't know			Don't know			Don't know			Don't know			Don't know			Don't know			No	No
48	52	Yes	51	Female	Acupuncturist or traditional Chinese medicine (TCM) practitioner		London South Bank University	British Acupuncture Council (BAcC)		Traditional Chinese Medicine, TCM		2	No				No	No		Yes	Yes		No	No		Yes	No		No	No		Yes	Yes		Yes			Yes	Yes		Yes	Yes		Yes	Yes		No	No
49	53	Yes	51	Female	Other	Occupational Therapist	TAA	British Acupuncture Council (BAcC)		Five Element, 5E		2	Yes	Patient beliefs can be a factor in the success or otherwise of treatment. Also how likely patients are to continue through a course of treatment. Some people don’t actually want to get better - this can be subconscious as patients may gain from their condition, illness or situation. Factors eg. Motivation to book, attend, consider advice given in treatment all make a difference.			Yes		Females seem more open to treatment in general.	Don't know			Yes		Some cultures seem more open to treatment and seek acupuncture for assistance.	Don't know			Yes		Some people seem more open to complementary therapies.	Don't know			Don't know			Don't know			Don't know			Don't know			Don't know
50	54	Yes	37	Female	Acupuncturist or traditional Chinese medicine (TCM) practitioner		CICM	British Acupuncture Council (BAcC)		Traditional Chinese Medicine, TCM,Five Element, 5E		2	Yes	Some patients seem to be self sabotaging and come convinced that acupuncture does not work. It often does work well for them but they need constant reminders of how far they have come. Or their belief slows down progression as they expect to get worse again. Others are very positive despite little progress. This makes me consider the difference between getting better and relieving suffering and h…			Yes	Yes	Women often seem more open and responsive to treatment.	Yes	Yes	Younger people seem to get better faster with much older people being harder to treat.	Don't know			Yes			Yes			Yes			Yes	Yes		Don't know			Yes	Yes	Adult patients stuck in 'child' or victim mentality due to trauma in childhood find it very hard to heal without a lot of trust building and patient work over time. I offer refer to a psychotherapist too as talking therapy seems to help alongside acupuncture in these cases.	Yes	Yes		Don't know
51	55	Yes	53	Female	Acupuncturist or traditional Chinese medicine (TCM) practitioner		The Acupuncture Academy	British Acupuncture Council (BAcC)		Five Element, 5E		2	Yes	Certain types of people are attracted to my way of working. If they want or need a quick fix I generally don’t satisfy that need. I treat short term patients for aches and pains but the patients that stay for long term treatment generally want to tackle underlying issues. The more open they are the better the treatment. Saying that lots of patients who initially are sceptical do have good positiv…			Yes	Yes		Yes	Yes		Yes	Yes	Having treated many charity pxs who refugees it seems to me that culture does often affect the speed and strength of the response to treatment. I’m still not sure whether it’s the free treatment or the culture of openness or the depth of the pxs trauma that makes the difference	Yes	Yes		Yes	Yes		Yes	Yes		Yes	Yes		Yes	Yes		Yes	Yes		Yes	Yes		Yes	Yes
52	56	Yes	39	Female	Acupuncturist or traditional Chinese medicine (TCM) practitioner		Middlesex university	Association of Traditional Chinese Medicine (ATCM)		Traditional Chinese Medicine, TCM		11	Yes	Ability to report back on signs and symptoms, personality traits as related to imbalance e.g.: blood stasis and also traits of fixation or being driven to continue lifestyle and attributing factors that are affecting their health as identified by TCM			No	No		Yes	Yes	Vitality of patient and ability to recover from illness is sometimes affected by age.	No	No		Yes	Yes	In theory at first re: from jing upwards and condition of parents but more so now after seeing children of older parents and condition of lung and kidney qi on children of some difficult IVF or supported fertility programs	No	No		Yes	Yes	Not just health of child but lifestyle and dietary intake of the child inc. over tired, too many after school activities and long study days	Yes	Yes		Yes	Yes		Yes	Yes		Yes	Yes		Yes	Yes
53	57	Yes	47	Male	Acupuncturist or traditional Chinese medicine (TCM) practitioner		UK & Ireland school of TCM	Chinese Medical Institute and Register (CMIR)		Japanese acupuncture,Western medical acupuncture		18	Yes	I rate clients in he following way. Reactor: Low, Medium, High, Very High. This is based on responses during treatments and following treatments.			No	No		No	No		No	No		No	No		No	No		No	No		No	No		No	No		No	No		No	No		No	No
54	58	Yes	27	Female	Physiotherapist		AACP	Acupuncture Association of Chartered Physiotherapists (AACP)		Trigger point method,Western medical acupuncture		5	Yes	Alpha strong relaxation response. Beta- depressive strong excitatory response			No	Yes		Yes	Yes		Yes	No		Don't know			Don't know			Don't know			Don't know			Don't know			Don't know			Don't know			No	No
55	59	Yes	59	Male	Acupuncturist or traditional Chinese medicine (TCM) practitioner		CICM	Association of Traditional Chinese Medicine (ATCM)		Traditional Chinese Medicine, TCM,Five Element, 5E,Other	FSN	19	Yes	I have always been interested in why treatment hasn't had a good response.			No	No		Yes	Yes	I've noticed that older people with chronic problems don't respond well - perhaps their systems are just too weak.	No	No		Don't know			Don't know			Don't know			Don't know			No	No		Yes	Yes		Yes	Yes		Yes	Yes	I've noticed that highly educated people are often very skeptical of TCM, and only listen to explanations from biochemical view points.
56	60	Yes	51	Male	Acupuncturist or traditional Chinese medicine (TCM) practitioner		Middlesex University	Association of Traditional Chinese Medicine (ATCM)		Traditional Chinese Medicine, TCM		20	Yes	the above are TCM diagnostic evaluation tools and need to be considered for a comprehensive diagnosis			Yes	Yes		Yes	Yes		Yes	Yes		No	No		No	No		No	Yes		No	Yes		Yes	Yes		Yes	Yes		No	No		Yes	Yes
57	61	Yes	65	Female	Acupuncturist or traditional Chinese medicine (TCM) practitioner		Beijing University of TCM China	British Acupuncture Council (BAcC),Other (or None)	ATCM	Traditional Chinese Medicine, TCM		26	Yes	Some sensitive person, intellectuals can have more worry, even prejudice to acupuncture and TCM who need to be more explanation before treatment.			Yes	Yes	The women are more on sensitive person, the men can also been seen	Yes	Yes		Yes	Yes		Yes	Yes		Yes	Yes		Yes	Yes		Yes	Yes		No	No		Yes	Yes		Yes	Yes		Yes	Yes
58	62	Yes	59	Female	Acupuncturist or traditional Chinese medicine (TCM) practitioner		B. Ac C	Association of Traditional Chinese Medicine (ATCM),British Acupuncture Council (BAcC)	TCMCI	Traditional Chinese Medicine, TCM,Five Element, 5E,Other	Meridian therapy	24	Yes	I feel patients who feel Qi easily respond better			No	No	Sorry from column below. I have 3 90 year old patients. Children respond quickly due to the acute nature of the problem.	No	No	A man once said that Women respond better to acupuncture as they have a placebo affect! Rubbish	No	No	I say no but in Ireland I don’t have many patients to compare	No	No	I have several premature children as patients. They are doing great	No	No		No	No	Except if a mature person has a childhood history of illness it takes longer to achieve results	Don't know		Genetically & mentally perhaps? If you mean that a parent was mortally I’ll yes of course it affects the patient	Yes			Yes			Yes			No
59	63	Yes	50	Male	Acupuncturist or traditional Chinese medicine (TCM) practitioner		aprentiship	Association of Traditional Chinese Medicine (ATCM)		Traditional Chinese Medicine, TCM		2	Yes	it is a holistic system...			No			No			No			Yes			Yes			Yes			Yes			Yes			Yes			Yes			No
60	64	Yes	59	Male	Other	Hypnotherapist	Acupuncture society	Acupuncture Society (AS)		Other	ear acupuncture	10	Yes	combining hypnotherapy with acupuncture gives better results			Yes	No		No	No		Yes	No		Don't know			Don't know			Don't know			Don't know			Don't know			Yes	Yes		Yes	Yes		No	No
61	65	Yes	42	Female	Acupuncturist or traditional Chinese medicine (TCM) practitioner	nurse	london south bank university	Acupuncture Society (AS)		Traditional Chinese Medicine, TCM,Other	microsystems	2	Yes	Beliefs and values have an impact as well as current trends.			Yes	Yes	Most clients are women and they tend to know more about acupuncture and alternative medicine. Men I have found are mainly on detox for addictions ro have been advised by wife/partner to try.	Don't know			Yes	Yes	Most of my patients are english as in european or other european. The project I work on is targeting poorer members of the community.	Yes	Yes	1 client wanted to be induced by acupuncture as she read about it. Continued to have acupuncture post brith to help with energy levels and breast milk production.	Yes	Yes	I think once I have explained to the patient how acupuncture works they are likely to try it. I often ask for feed back using mymop forms. Feedback is more people should know about how acupuncture works!	Yes	Yes	Client has requested i treat their 2 year old son for a common cold and runny nose as she prefers not to use over the counter medicines frequently.	Don't know			Don't know			Don't know			Yes	Yes	I am currently running a clinic for st mungos working with the homeless addicts and residents with mental health issues. Strong responses to acupuncture main is not enough known about how it can help with wellbeing. and	Yes	Yes	Yes this has an impact as a positive result reinforces what has been read about acupunctures benefits.
62	66	Yes	72	Female	Other	International development and retired	Paul Robin CCM	Acupuncture Society (AS)		Traditional Chinese Medicine, TCM,Five Element, 5E,Korean acupuncture,Other	Ear and scalp	1	Yes	Anxious or hostile patients, or in great pain, are more difficult			No	No		No	No		No	No		No	No		No	No		No	No		Yes	Yes		No	No		Yes	Yes		Yes	Yes		No	No
63	67	Yes	39	Male	Acupuncturist or traditional Chinese medicine (TCM) practitioner		Malaysia College of Chinese Medicine	Acupuncture Society (AS)		Traditional Chinese Medicine, TCM,Japanese acupuncture,Korean acupuncture,Trigger point method,Other	Tung acupuncture	10	No				No			Yes			No			No			No			No			No			No			No			No			No
64	68	Yes	52	Male	Acupuncturist or traditional Chinese medicine (TCM) practitioner		The Chinese Medical College	Acupuncture Society (AS)		Formula method,Other	HuaTo	1	Yes	Calm patients tend to respond better to treatment, and to the whole experience.			No	No		Yes	No	I thought that young people age 16 plus, may be more scared of needles than adults, but it is not always the case.	Don't know	No		Don't know		Don't know	Don't know			Don't know			Don't know			Don't know			Yes	Yes	It may have an adverse sphycological effect	Don't know		Perhaps	Don't know
65	69	Yes	31	Female	Acupuncturist or traditional Chinese medicine (TCM) practitioner		Uk academy of Chinese medicine	Acupuncture Society (AS)		Traditional Chinese Medicine, TCM		2	Yes	It is affect the treatment results when they have different characteristics			Yes	Yes	Different thinkings and also yin and Yong balance	Yes	Yes	Younger person recovered quickly	No	No		No	No		Don't know	No		No	No		Yes	Yes	The Foundation of their own health	Don't know	No		Yes	Yes	Personality	Yes	Yes	Personality	Yes	Yes	Stress level
66	70	Yes	54	Male	Chiropractor		TCM	Association of Traditional Chinese Medicine (ATCM)		Traditional Chinese Medicine, TCM,Formula method		7	Yes	I allocate more time to reassure my patients and take more time to explain and to gain their trust with me & the treatment.			Yes	Yes		No	Yes		Yes	Yes		Yes	Yes		Don't know		N/A as I don't treat babies, children or adolescents in my clinic with Acupuncture	Don't know		As above	Yes	Yes		Don't know			Don't know			Don't know			Yes	Yes
67	71	Yes	57	Female	Acupuncturist or traditional Chinese medicine (TCM) practitioner		BAC	Acupuncture Society (AS)		Traditional Chinese Medicine, TCM,Five Element, 5E		23	Yes	Depressed and negative personally less responsive			Yes			No			No			Yes			No			Yes			Yes			Yes			Yes			Yes			Yes
68	72	Yes	54	Female	Acupuncturist or traditional Chinese medicine (TCM) practitioner		LCTA	Acupuncture Society (AS)		Traditional Chinese Medicine, TCM		7	Yes	If I feel comfortable with a patient, the treatments are often more successful.			No			No			No			No			No			Yes			No			Don't know			Don't know			Don't know			No
69	73	Yes	35	Female	Physiotherapist		BMAS	British Medical Acupuncture Society (BMAS),Other (or None)	ISCP (Irish society of chartered physiotherapist) special interest group; Chartered Physiotherapists in Acupuncture ( CPA)	Western medical acupuncture		10	Yes	I felt that some patients came to my clinic with very positive previous experiences for e.g. in acupuncture rx. For want of a better word, these patient types are 'convinced'. They usually respond very well. The more skeptical type patients tend to require a little more convincing.			No	No		Don't know	Yes		No	No		No	No		No	No		No	No		No	No		No	No		No	No		No	No		No	No
70	74	Yes	47	Female	Other	Midwife	BMAS	British Medical Acupuncture Society (BMAS),Other (or None)	Expectancy	Western medical acupuncture		2	Yes	Some personality traits might indicate a client expect better or quicker results after a treatment or not.			Yes	No	Women seem more open initially to try Acupuncture while men do not; yet when it is therapeutic for men they use it more frequently.	Yes	No	Older men and women are more open to acupuncture compared to younger generations.	Yes	Yes		Yes	No	If exposed to, or used acupuncture antenatally or in birth/labour.	Don't know	No		Yes	Yes		Yes	Yes	Impacts on the clients perception of health,choices and expectations of treatments.	Yes	No	Acupuncture often seen as a luxury treatment.	No	No	Clients more open to other complementary therapies but often not acupuncture.	No	No		Yes	No	High level of education - often requiring concrete evidence for efficacy; compared to lower level of education - often accepting and /or believing in efficacy.
71	75	Yes	62	Female	Medical doctor		BMAS	British Medical Acupuncture Society (BMAS)		Western medical acupuncture		4	No				Yes	Yes		Don't know	Yes		No			No	No		Don't know			Don't know			Don't know			Don't know			Don't know			Don't know			Yes	Yes
72	76	Yes	39	Female	Acupuncturist or traditional Chinese medicine (TCM) practitioner		Salford university	British Acupuncture Council (BAcC)		Traditional Chinese Medicine, TCM		10	No				No	No		No	No		No	No		No	No		No	No		Yes	Yes		No	No		Yes	No		Yes	No		Yes	No		No	No
73	77	Yes	31	Female	Acupuncturist or traditional Chinese medicine (TCM) practitioner		CTA	British Acupuncture Council (BAcC)		Five Element, 5E		5	Yes	I feel that occasionally some personality types may prefer to seem disssatfied with treatment in the belief they will receive more care. Nothing anything can do if any discipline will be able to help them in their opinion. Perhaps I’m discribing a victim complex, I’m not entirely confident in articulating the sense I feel. Also Perhaps some individuals enjoy treatment feel the need for a complain…			No	No		Yes	Yes		Yes	No		No	No		Don't know			No	No		Yes	No		No	No		Yes	No		Yes	No		Yes	No
74	78	Yes	61	Female	Acupuncturist or traditional Chinese medicine (TCM) practitioner		CTA	British Acupuncture Council (BAcC)		Five Element, 5E		35	Yes	In some but not all cases an open positive attitude helps . However some patients have improved despite being sceptical and others have notvdespite being positive			No	No		No	No		Don't know	No		No			No	No		No	No		No	No		No	No		Yes	Yes		Yes	Yes		No	No
75	79	Yes	42	Female	Acupuncturist or traditional Chinese medicine (TCM) practitioner		BAcc	British Acupuncture Council (BAcC)		Traditional Chinese Medicine, TCM,Other	master tung and dr tan	10	Yes	people who are very rigid seem to be less receptive to treatment			No	No		No	No		No	No		Don't know			Don't know			Yes	Yes		Yes	Yes		Don't know			Don't know			No	No		No	Yes
76	80	Yes	52	Female	Other	Also Naturopathic nutritionist and kinesilogy - recently qualified	CICM	British Acupuncture Council (BAcC)		Traditional Chinese Medicine, TCM,Five Element, 5E		5	Yes	When I first qualified I was intrigued that some complex patients responded amazingly well but that other apparently simpler cases not so well. Some of this may have been lack of experience at the start but now I believe it is so much more.			No	No		No	No		No	No		No	No		Yes	No		Yes	Yes		Yes	Yes		Yes	Yes		Yes	Yes		Yes	Yes		No	No
77	81	Yes	54	Female	Acupuncturist or traditional Chinese medicine (TCM) practitioner		Northern College of Acupuncture	Acupuncture Society (AS)		Traditional Chinese Medicine, TCM		20	Yes	A good example recently, a lady who simply could not relate to lifestyle advice i.e. she was fixed in her extreme exercise lifestyle and would not consider its effect on her pain. Also, thinking now, she seemed impenetrable (!) in her manner. Although we talked extensively, she never seemed to be able to answer questions with any clarity, leaving me feeling I wasn't able to connect with her.			No	No		No	No		Don't know			Don't know			Don't know			No	No		Yes	Yes		Don't know			Yes	Yes		Yes	Yes		No	No
78	82	Yes	48	Female	Acupuncturist or traditional Chinese medicine (TCM) practitioner		CICM	British Acupuncture Council (BAcC)		Traditional Chinese Medicine, TCM,Five Element, 5E		4	Yes	Since I started practising I’ve become quite adept as predicting who will respond well based on the initial consultation.			No	Yes		No	Yes		Don't know			Don't know	Yes		Don't know	No		No	No		No	No		No	No		No	No		No	No		No	No
79	83	Yes	35	Female	Acupuncturist or traditional Chinese medicine (TCM) practitioner		LCTA	British Acupuncture Council (BAcC)		Traditional Chinese Medicine, TCM		8	No				No	No		Yes	Yes	Best results for me are on patients aged 25-75. Not so good on under 25's unless purely MSK and I overall have less successful outcomes with over 75's.	No	No		No	No		No	No		No	No		No	No		No	No		Yes	No		No	No		No	No
80	84	Yes	51	Female	Acupuncturist or traditional Chinese medicine (TCM) practitioner		CTA	British Acupuncture Council (BAcC)		Five Element, 5E		10	Yes	i have considered it and found over time that often those who are most skeptical or those who come to me as a last resort because they had tried everything else often are very quick responders. Even those who say they don't believe in it but are now desperate.			No	No		No	No		No	No		No	No		No	No		No	No		No	No		Don't know	No		Don't know	No		Don't know	No		Don't know	No
81	85	Yes	57	Female	Acupuncturist or traditional Chinese medicine (TCM) practitioner		C.T.A Leamington	Acupuncture Society (AS),British Acupuncture Council (BAcC)		Five Element, 5E,Japanese acupuncture		15					No			No			No			Yes			Don't know			Don't know			Don't know			Don't know			Don't know			Don't know			Don't know
82	86	Yes	57	Female	Acupuncturist or traditional Chinese medicine (TCM) practitioner		Collage of Integrated Chinese Medicine, Reading	British Acupuncture Council (BAcC)		Traditional Chinese Medicine, TCM,Five Element, 5E		7	Yes	It spends on personality traits and their ability to effect lifestyle changes			Yes	Yes	But it also depends on personality type and the higher percentage of females to males having acupuncture	No	No		No	No		No	No		No	No		Yes	Yes		Yes	Yes		Don't know		I haven't dealt with anyone in this category	Yes	Yes		Yes	Yes		No	No
83	87	Yes	77	Male	Acupuncturist or traditional Chinese medicine (TCM) practitioner		British Acupuncture Association & Traditional Acupuncture Society	British Academy of Western Medical Acupuncture (BAWMA)		Western medical acupuncture		45	Yes	Obsessive sports enthusiasts frequently ignore advice			No	No		Yes	Yes		No	Yes		Yes	Yes		Yes	No		Yes	Yes		No	Yes		Yes	Yes		Yes	Yes		Yes	Yes		Don't know
84	88	Yes	52	Male	Acupuncturist or traditional Chinese medicine (TCM) practitioner	Tuina medical Massage	Several Trainers	Acupuncture Society (AS)		Traditional Chinese Medicine, TCM		8	Yes	I look at the Shen and consider treatment			Don't know			No			No			No			No			No			No			No			No			No			No
85	89	Yes	49	Male	Chiropractor		BMAS	British Medical Acupuncture Society (BMAS)		Western medical acupuncture		4	Yes	OPENESS TO VIEWS OF PRACTITIONER			No	No		No	No		No	No		No	No		No	No		No	No		No	No		No	No		No	No		No	No		No	No
86	90	Yes	52	Male	Acupuncturist or traditional Chinese medicine (TCM) practitioner		CTA	Acupuncture Society (AS)		Five Element, 5E		13	Yes	It seems obvious that temperament and personality would affect a person’s response to most things			No	No	Irrelevant to px response	No	No		No	No		No	No		No	No		No	No		No	No		No	No		No	No		No	No		No	No
87	91	Yes	41	Female	Acupuncturist or traditional Chinese medicine (TCM) practitioner		College of Chinese Medicine (CCM)	Acupuncture Society (AS)		Traditional Chinese Medicine, TCM		1	Yes	I have found generally those patients with a more open mind or broader outlook respond more positively to TCM treatment.			No	No		No	No		Don't know	No		No	No		No	No		Yes	Yes		No	No		Yes	Yes		Yes	Yes		Yes	Yes		No	No
88	92	Yes	50	Female	Acupuncturist or traditional Chinese medicine (TCM) practitioner			Acupuncture Society (AS)		Traditional Chinese Medicine, TCM,Five Element, 5E,Korean acupuncture		3	Yes	unable to pin point in a few words			No	No		No	No		No	No		Don't know			Don't know			Yes			Yes			Don't know			Don't know			Don't know			No	Yes
89	93	Yes	66	Female	Acupuncturist or traditional Chinese medicine (TCM) practitioner		CICM	British Acupuncture Council (BAcC)		Traditional Chinese Medicine, TCM,Five Element, 5E		20	Yes	Doubt and hostility can get in the way.			No			No			No			No			Don't know			Don't know			No			No			Don't know			Don't know			No
90	94	Yes	58	Female	Acupuncturist or traditional Chinese medicine (TCM) practitioner		BAWMA	British Academy of Western Medical Acupuncture (BAWMA)		Western medical acupuncture		14	Yes	I have found that some people enjoy being not well. Once they start responding they stop attending. They simply don't want to be cured.			No	No		No	No		No	No		Don't know			Don't know			Yes	Yes		No	No		No	No		Yes	Yes		Yes	Yes		No	No
91	95	Yes	53	Female	Acupuncturist or traditional Chinese medicine (TCM) practitioner		CTA	British Acupuncture Council (BAcC)		Five Element, 5E,Trigger point method		8	Yes	SOME PATIENTS COME FOR TREATMENT WITHOUT AN OPEN MIND WHEN ENCOURAGED BY SOMEONE ELSE			No	No		Yes	Yes		No	No		No	No		Don't know			No	No		Don't know			Don't know			Yes	Yes		Yes	Yes		No	No
92	96	Yes	47	Male	Medical doctor		medical academy	Acupuncture Society (AS)		Traditional Chinese Medicine, TCM,Korean acupuncture,Trigger point method,Western medical acupuncture		10	Yes	it is not only in TCM they show different responses to treatment, a similar trend can be seen in ostheo and traditional therapy. it is just their temperament and personality traits. But, some of them reacts very positively to psychotherapy. and another probably the most important factor is the age and chronic structural changes in organs and tissues.			No	No		Yes	Yes	the older patient (above 75 y.o) the less responsive to treatment	No	No		Yes	Yes	women with post-epidural symptoms react initially differently	No	No		No	No		No	No		No	No		Yes	Yes		Yes	Yes		Yes	Yes
93	97	Yes	49	Male	Other	Test Analyst	Not trained before	Other (or None)	None	Other	Have not started my training yet	0	Yes	Just from talking to people some respond better than others			Yes	Yes		Yes	Yes		No	No		No	No		No	No		Yes	Yes		No	No		No	No		No	No		No	No		No	No
94	98	Yes	57	Female	Acupuncturist or traditional Chinese medicine (TCM) practitioner		LCTA	Acupuncture Society (AS)		Traditional Chinese Medicine, TCM		7	Yes	I had noticed that if people are "asked" to come for treatment eg. a child by a parent, and have a negative attitude toward it, the results will be negligible.			Yes	Yes	Men seem more sceptical.	Yes	Yes	Older people have less energy to help in the healing process.	No	No		No	No		No	No		No	No		No	No		No	No		No	No		No	No		No	No
95	99	Yes	61	Male	Acupuncturist or traditional Chinese medicine (TCM) practitioner		Various	British Acupuncture Council (BAcC)		Traditional Chinese Medicine, TCM,Five Element, 5E		31	Yes	Always been interested in why some people do well, others less so. Have always accepted my part in whether they do well or not			No	No		Yes	Yes		No	No		Don't know			No			Yes	Yes		Don't know			No	No		No	No		No	No		No	No
96	100	Yes	33	Female	Other	Bank manager	CCM	Acupuncture Society (AS),Other (or None)		Traditional Chinese Medicine, TCM,Formula method		0	Yes	From patients in clinic I noticed different responses/behaviour			Yes	Yes	females more sensitive	Yes	Yes	Older respond better	Don't know	No		Don't know	No		Yes	No		Don't know	No		Yes	No		Don't know	No		Yes	No		Yes	No		Yes	Yes
97	101	Yes	57	Female	Other	Nurse	Nhs	British Academy of Western Medical Acupuncture (BAWMA),British Medical Acupuncture Society (BMAS)		Western medical acupuncture		8	Yes	Patients that are very sensitive to drugs or other alternative therapies affect their responses to treatment. Ie fibromyalgia or patients with ME etc			Don't know	No	I don’t think gender affects response	No	No	I don’t think age affects response	Yes	Yes	I believe genetics affects many things including pain and this includes response to acupuncture	Don't know			Yes	Yes	Psychological response affects everything	Don't know			Don't know			Don't know			Don't know			Don't know			Don't know
98	102	Yes	52	Female	Acupuncturist or traditional Chinese medicine (TCM) practitioner		LCTA	British Acupuncture Council (BAcC)		Traditional Chinese Medicine, TCM,Other	Master Tung	6	Yes	I have observed this in clinical practice - some people are 'super responders'			No	No		Yes	Yes		No			No			No			No			No			No			No			No			No
99	103	Yes	43	Female	Other	Nurse	BAWMA	British Academy of Western Medical Acupuncture (BAWMA)		Western medical acupuncture		2	Yes	If a person is closed/negative it can affect the therapeutic relationship This can have detrimental effects on the outcome. Their level of engagement will alter effects. The placebo effect also plays a part in this.			No	No		No	Yes		No	No		No	No		Don't know	No		Yes	Yes		Yes	Yes		Yes	Yes		Yes	Yes		Don't know	Yes		Yes	Yes
100	104	Yes	42	Female	Acupuncturist or traditional Chinese medicine (TCM) practitioner		School of Five Element Acupuncture and Scuola Italiana di Agopuntura	British Acupuncture Council (BAcC)		Five Element, 5E,Other	Classical Acupuncture	13	Yes	It is something I have been wondering about and observing in my practice for years. There are substantial differences in the responses to the acupuncture treatments in different people.			Yes	No	Very generally speaking men appear to respond quicker to treatment. I understand it as the predominantly Yang energy that moves quicker than the predominantly Yin energy, which is by nature slower.	Yes	Yes	This is mainly due to the fact that the illness becomes more chronic with the age and therefore takes longer to treat.	No	No	Makes no difference in my experience.	Yes	Yes	Theoretically I know it can impact the overall wellbeing of the patient. Birth and prenatal traumatic experiences are more deep seated and may take longer to respond to treatment if this is what blocks the response.	Yes	Yes	The longer a patient cultivates a certain character/ behavior patterns the longer it would take to transform them, if this is what is necessary to respond to the treatment.	Yes	Yes	By analogy to the above, only in respect to the physical health.	No	No	I have not made any connection.	No	No	I have not made any connection.	Yes	Yes	Like with the birth and prenatal, also childhood traumas are more chronic and deep seated. If they are the block to treatment it may take longer to receive the response.	No	No	Depends more on the capacity to deal with trauma than the "objective" scale of the trauma.	No	No	No correlation.
101	105	Yes	54	Female	Acupuncturist or traditional Chinese medicine (TCM) practitioner		Acuregen Ltd	Acupuncture and Acutherapy Council (AcuC)		Traditional Chinese Medicine, TCM,Five Element, 5E	TuiNa Massage	8	Yes	I usually do a diagnosi, feel the pulse and read the sign on the tongue included the coil...I sually dont treat people with blood deasease as diabetis, or infections,or with mental problems,nor pregnant people.			Yes	Yes	yes because the hormones works different between the two gender.	Yes	Yes	the whole body has different issues due to the age and the reaction to recovery is differentbetween a young person and an old one	Yes	Yes	different clima, food affect the bioritmo and the personality too.	Yes	Yes	because the weight at the birth might affect the devolopof certain desease,the type of gestation tell me how his subconscious react at specific events..	No	No		Yes	Yes	it help me to understand the weak point of the reaction of body,immune system..	Yes	Yes	genetic desease	Yes	Yes	it show me better the character, his diet habits	Yes	Yes	it help me to understand his subconscious reactio	No	No		Yes	Yes	to be able to change the habit like bad diet, to give him the ability to react at specificphisical event with awareness
102	106	Yes	58	Female	Acupuncturist or traditional Chinese medicine (TCM) practitioner		CNM	British Acupuncture Council (BAcC)		Traditional Chinese Medicine, TCM		15	Yes	Sometimes a patient has tried so many different therapies, I have the impression that trying acupuncture is almost a box ticking exercise in a long list of therapies. Sometimes these patients can surprise me by responding well to acupuncture. Other patients might just try the treatment out of curiosity. Alternatively they may fail to respond well because they need to address crucial lifestyle iss…			No	No		No	No		No	No		No	No		No	No		No	No		No	No		No	No		No	No		No	No		No	No
103	107	Yes	35	Female	Acupuncturist or traditional Chinese medicine (TCM) practitioner		University of Westminster	British Acupuncture Council (BAcC)		Traditional Chinese Medicine, TCM		9	Yes	Compliance is very important			No	No		No	No		No	No		No	No		Yes	Yes		Yes	Yes		Yes	Yes	Genetic conditions	Yes	Yes		Yes	Yes		Yes	Yes		No	No
104	108	Yes	41	Female	Acupuncturist or traditional Chinese medicine (TCM) practitioner		College of integrated chinese medicine	British Acupuncture Council (BAcC)		Traditional Chinese Medicine, TCM,Five Element, 5E		6	Yes	Patients who had low self esteem seemed to respond poorly			Don't know	No		Yes	Yes	when patients are over around 70, i have found them to respond more slowly to treatment overall - this may be as i treat them more gentle	No	No		Don't know			Don't know			Yes	Yes		Don't know			Don't know			Yes	Yes		Don't know			Yes	Yes
105	109	Yes	40	Female	Acupuncturist or traditional Chinese medicine (TCM) practitioner		CICM	British Acupuncture Council (BAcC)		Traditional Chinese Medicine, TCM,Five Element, 5E,Other	Tung style	12	Yes	Sometimes people are a really clear CF, with problems that correspond with one emotional need			No	Yes	I think I'm more likely to see women in the clinic. I might have thought that they responded better	No	No		No	No		Yes	No	I'm starting to think about birth trauma... Family 'patterns' are always fascinating (i don't have any answers about them though)	Don't know			Yes	Yes	Maybe there's something with how people respond to health needs as children... & then as adults...	Don't know		Difficult to say if this affects response to treatment. Emotional awareness (& being aware of changes in emotional feelings) can make a difference to how people feel they are doing with treatment. Maybe this is affected by family health history? I've got an interesting mother & child at the moment, maybe i could report more in the future...?!	No	No		Don't know		I have no experience of this	Don't know			No	No
106	110	Yes	49	Male	Acupuncturist or traditional Chinese medicine (TCM) practitioner		CTA	Acupuncture Society (AS)		Five Element, 5E		10	No				No	No		Yes	Yes		No	No		No	No		No	No		No	No		Yes	Yes		No	No		Yes	Yes		Yes	Yes		No	No
107	111	Yes	43	Male	Acupuncturist or traditional Chinese medicine (TCM) practitioner		University	Acupuncture Society (AS)		Traditional Chinese Medicine, TCM,Five Element, 5E		10	No				No	No		Yes	Yes		No	No		No	No		Yes	Yes		Yes	Yes		Yes	Yes		Yes	Yes		Yes	Yes		Yes	Yes		No	No
108	112	Yes	49	Female	Acupuncturist or traditional Chinese medicine (TCM) practitioner		Total Therapy Training	Other (or None)	British Acupuncture Federation	Traditional Chinese Medicine, TCM,Japanese acupuncture,Other	Tung	6	Yes	If someone is closed minded and refuses to respond to a treatment, no treatment is going to work 100% for them, open mindedness and positivity helps enormously.			No	No		Yes	Yes	Very old people with little Jing heal slower and can drain with acupuncture if done wrong. The young heal faster.	No	No		No	Yes		Yes	No	Positivity towards healing in general increases effectiveness.	No	No		No	No		No	No		No	No		No	No		No	No
109	113	Yes	64	Female	Acupuncturist or traditional Chinese medicine (TCM) practitioner		Leamington Spa and CICM	British Acupuncture Council (BAcC)		Traditional Chinese Medicine, TCM,Five Element, 5E		25	Yes	people have different attitudes, beliefs and levels of self awareness			Yes	Yes	women tend to be more open	No	No		No	No		Don't know			Yes	Yes		Yes	Yes		Yes	Yes		Don't know			Yes	Yes		Yes	Yes		Don't know
110	114	Yes	52	Male	Acupuncturist or traditional Chinese medicine (TCM) practitioner		British Acupuncture Association Heilpraktiker Schule Lotz	Acupuncture Society (AS)		Other	Biomechanical Acupuncture	25	Yes	People "who believe in" acupuncture tend to respond faster People "who don't believe "acupuncture might respond slower or not allow themselves to take note of positive changes. People who are very fearful of needles might not take up acupuncture or only have a limited number of needles. In the context of Biomechanical Acupuncture where I work with chronic pain and muscular skeletal dysfunction I …			No			Yes			No			Yes			Don't know			Yes			Yes			Yes			Yes			Yes			No
111	115
112	116		52							YES counts		10	96				31	27		48	47		21	13		33	23		31	22		54	46		47	41		31	26		65	54		62	53		28	30
										% of 113			84.2105				27.4336	23.8938		42.4779	41.5929		18.5841	11.5044		29.2035	20.354		27.4336	19.469		47.7876	40.708		41.5929	36.2832		27.4336	23.0088		57.5221	47.7876		54.8673	46.9027		24.7788	26.5487
																NOW	THEN
																	1	56		2	57		3	58		4	59		5	60		6	61		7	62		8	63		9	64		10	65		11	66
																	31	27		48	47		21	13		33	23		31	22		54	46		47	41		31	26		65	54		62	53		28	30
																	27.4336	23.8938		42.4779	41.5929		18.5841	11.5044		29.2035	20.354		27.4336	19.469		47.7876	40.708		41.5929	36.2832		27.4336	23.0088		57.5221	47.7876		54.8673	46.9027		24.7788	26.5487
																	10.1.	10.2.	10.3.	10.4.	10.5.	10.6.	10.7.	10.8.	10.9.	10.10.	10.11.	10.12.	10.13.	10.14.	10.15.	10.16.	10.17.	10.18.	10.19.	10.20.	10.21.	11.1.	11.2.	11.3.	11.4.	11.5.	11.6.	11.7.	11.8.	11.9.	11.10.	11.11.	11.12.
																NOW	1	2	3	4	5	6	7	8	9	10	11	12	13	14	15	16	17	18	19	19	20	20	21	21	22	23	24	25	26	27	28	29	30
													Q3 (sections 10-12)		71		31	48	21	33	31	54	47	31	65	62	28	30	60	44	65	62	44	50	85	85	61	89	50	93	65	64	90	59	55	63	44	17	74
													Q1 (sections 10-12)		46.25		27.4336	42.4779	18.5841	29.2035	27.4336	47.7876	41.5929	27.4336	57.5221	54.8673	24.7788	26.5487	53.0973	38.9381	57.5221	54.8673	38.9381	44.2478	75.2212	75.2212	53.9823	78.7611	44.2478	82.3009	57.5221	56.6372	79.646	52.2124	48.6726	55.7522	38.9381	15.0442	65.4867
																THEN	56	57	58	59	60	61	62	63	64	65	66	67	68	69	70	71	72	73	74	74	75	75	76	76	77	78	79	80	81	82	83	84	85
													Q3 (sections 10-12)		56.75		27	47	13	23	22	46	41	26	54	53	30	29	44	32	55	50	36	45	73	71	45	74	38	73	52	48	72	51	44	50	30	16	60
													Q1 (sections 10-12)		40.25		23.8938	41.5929	11.5044	20.354	19.469	40.708	36.2832	23.0088	47.7876	46.9027	26.5487	25.6637	38.9381	28.3186	48.6726	44.2478	31.8584	39.823	64.6018	62.8319	39.823	65.4867	33.6283	64.6018	46.0177	42.4779	63.7168	45.1327	38.9381	44.2478	26.5487	14.1593	53.0973
																now	then																					[[[]]]
													Lowest scored		10.3	21	13	Ethnicity
															11.11	17	16	Issues with gender identity or sexual orientation
															12.16	21	15	Alexithymic
													Highest scored		11.3	93	73	Ability to relax
															11.6	90	72	Self-motivation
															12.11	101	84	Willing to follow advice or instructions
[truncated: 167 more columns]
